# Supplementary material
Source: publisher figshare collection journal article supplement (https://acs.figshare.com/ndownloader/files/5162608)
Supplement: Supplementary file 1 [file 5162608]

# Supporting Information

## Insertion of Carbon Dioxide into Mg-N Bonds. Structural Characterization of a Previously Unknown $\eta^2$ Chelation Mode to Mg in Magnesium Carbamates

Yongjun Tang,<sup>†</sup> Lev Zakharov,<sup>‡</sup> Arnold L. Rheingold,<sup>‡</sup> and Richard A. Kemp<sup>\*†,§</sup>

<sup>†</sup>Department of Chemistry, University of New Mexico, Albuquerque, NM USA

<sup>‡</sup>Department of Chemistry and Biochemistry, University of California, San Diego, La Jolla, CA USA

<sup>§</sup>Advanced Materials Laboratory, Sandia National Laboratories, Albuquerque, NM USA

E-mail: rakemp@unm.edu. Phone: (505) 277-0510. Fax: (505) 277-2609.

| Contents:                                                                                | Page |
|------------------------------------------------------------------------------------------|------|
| 1. ORTEP of [Mg <sub>2</sub> (O <sub>2</sub> CNCy <sub>2</sub> ) <sub>4</sub> (HMPA)], 1 | 2    |

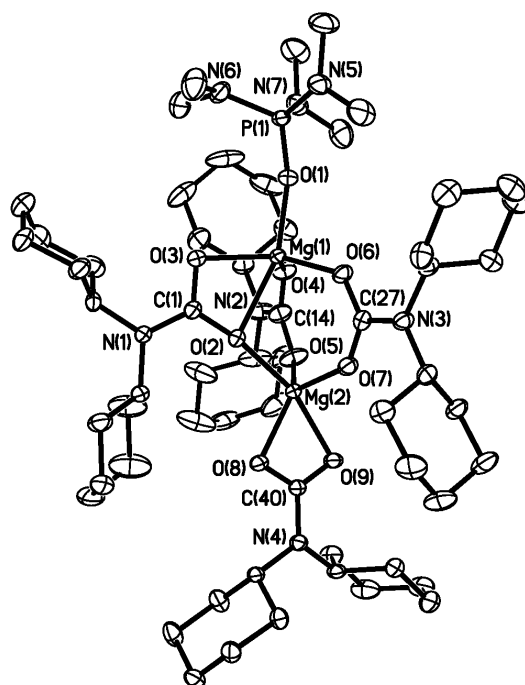

An ORTEP view of for  $[\text{Mg}_2[\text{O}_2\text{CNCy}_2]_4(\text{HMPA})]$ , **1** (50% probability). The H atoms and solvent hexane molecule are omitted for clarity.
